# Supplementary material for: Effects of nitrogen nutrition on the synthesis and deposition of the ω-gliadins of wheat
Source: PubMed Central journal article supplement (PMC3936585; doi:10.1093/aob/mct291), 2013-12-15

## SUPPLEMENTARY DATA

Table S1. Primers for real-time PCR and RNA probe synthesis (underlined sequences for T7 RNA polymerase site).

| Gene        |         | Primer sequence                                                     | PCR product size |                 |
|-------------|---------|---------------------------------------------------------------------|------------------|-----------------|
| $\omega$ -2 | Forward | TGGCCAATGAAATGAACACC                                                | 120bp            | Real-time PCR   |
|             | Reverse | GGTCGGGGTTACACATTATGG                                               |                  |                 |
|             | Forward | GAATTG <u>TAAATACGACTCACTATAGGG</u> CCATATGGGAGTAGTCTTAC            | 180bp            | Sense probe     |
|             | Reverse | GAACTTATTTGTCTTTTATTCCCATGTTTGG                                     |                  |                 |
|             | Forward | CCATATGGGAGTAGTCTTAC                                                | 180bp            | Antisense probe |
|             | Reverse | GAATTG <u>TAAATACGACTCACTATAGGG</u> GAACTTATTTGTCTTTTATTCCCATGTTTGG |                  |                 |
| $\omega$ -5 | Forward | CAAGAACCTTCCCCATACCA                                                | 117bp            | Real-time PCR   |
|             | Reverse | CAACGATGATTCACCCGTCT                                                |                  |                 |
|             | Forward | GAATTG <u>TAAATACGACTCACTATAGGG</u> GGCAAGAACCTTCCCCATACCA          | 217bp            | Sense probe     |
|             | Reverse | GAACTTATTTGTCTTTTATTCCCATGTTTGG                                     |                  |                 |
|             | Forward | GGCAAGAACCTTCCCCATACCA                                              | 217bp            | Antisense probe |
|             | Reverse | GAATTG <u>TAAATACGACTCACTATAGGG</u> GAACTTATTTGTCTTTTATTCCCATGTTTGG |                  |                 |

Fig. S1. Response of  $\omega$ -gliadins to nitrogen application and N-terminal sequencing in (A) 'Hereward' (reported by Shewry *et al.*, 2009b) and (B) 'Cordiale'. Fractions from grain grown at N100, N200, and N350 kg N ha<sup>-1</sup> are shown in lanes 1, 2 and 3, respectively.

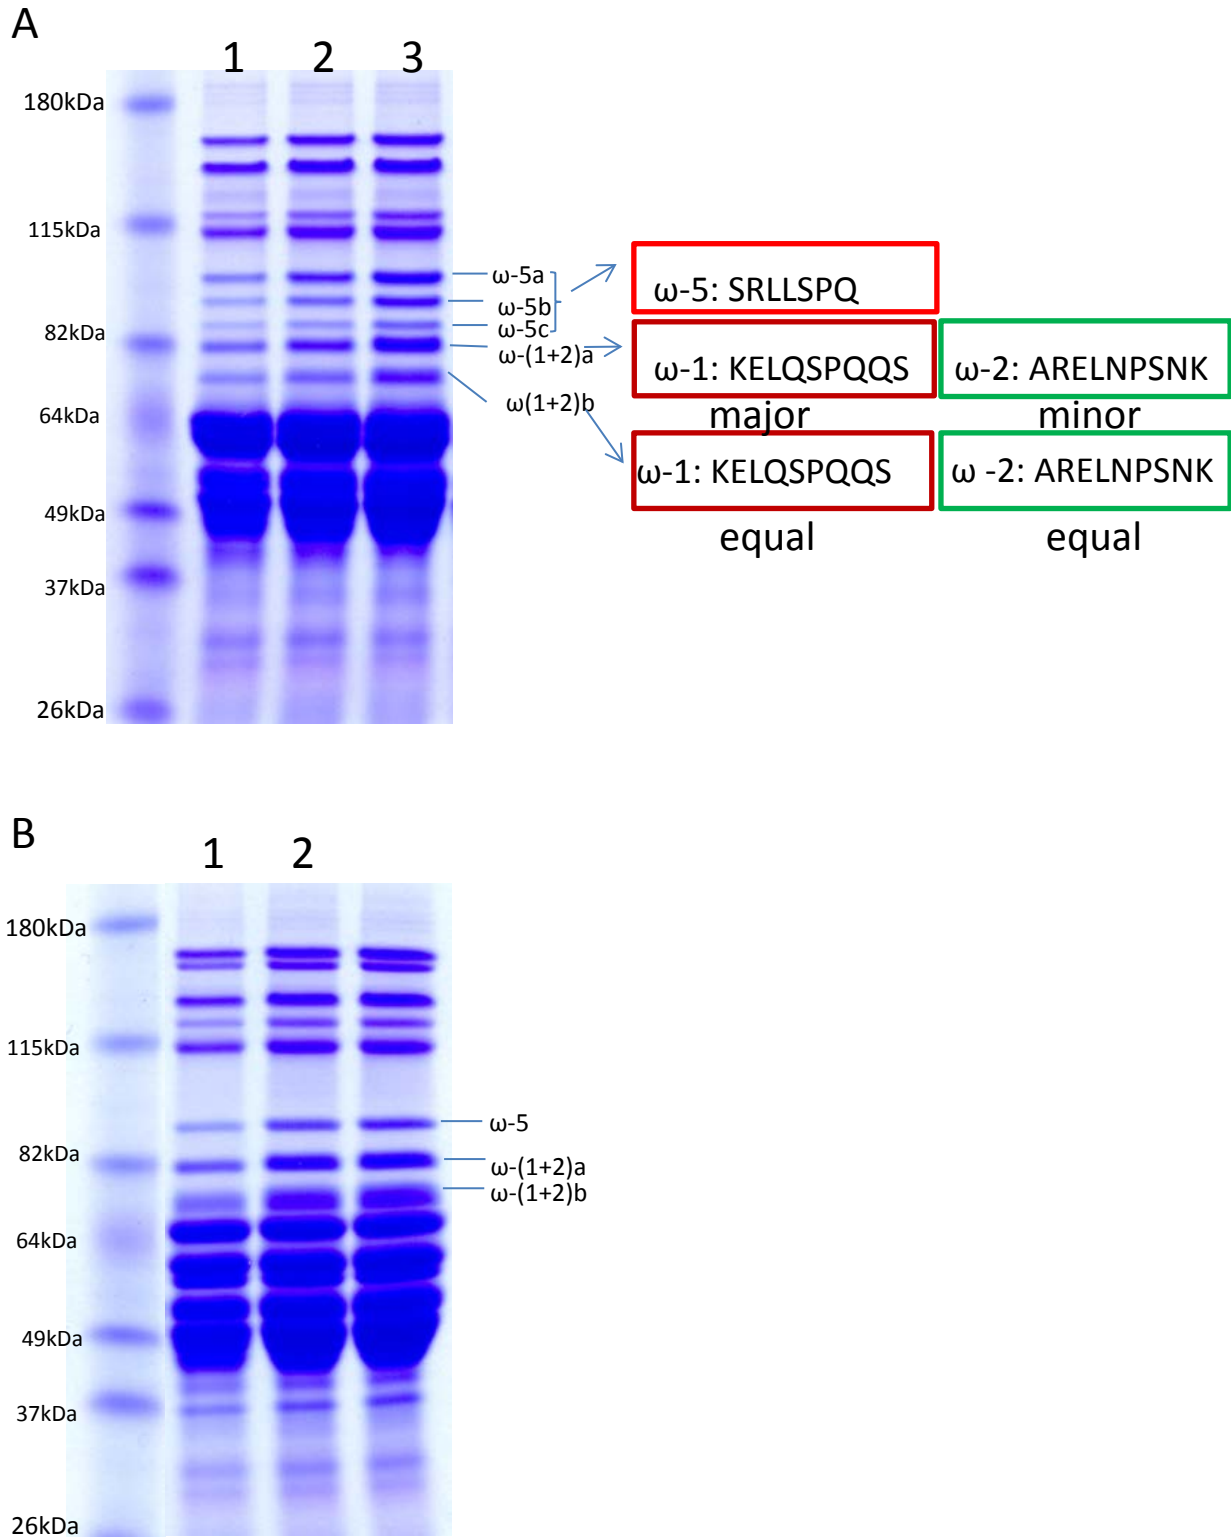

Fig. S2. Negative controls for *in situ* hybridisation using (A) the  $\omega$ -2 gliadin sense probe and (B) the secondary antibody only for immunofluorescence analysis of  $\omega$ -5 gliadin. Scale bars: 500  $\mu$ m.

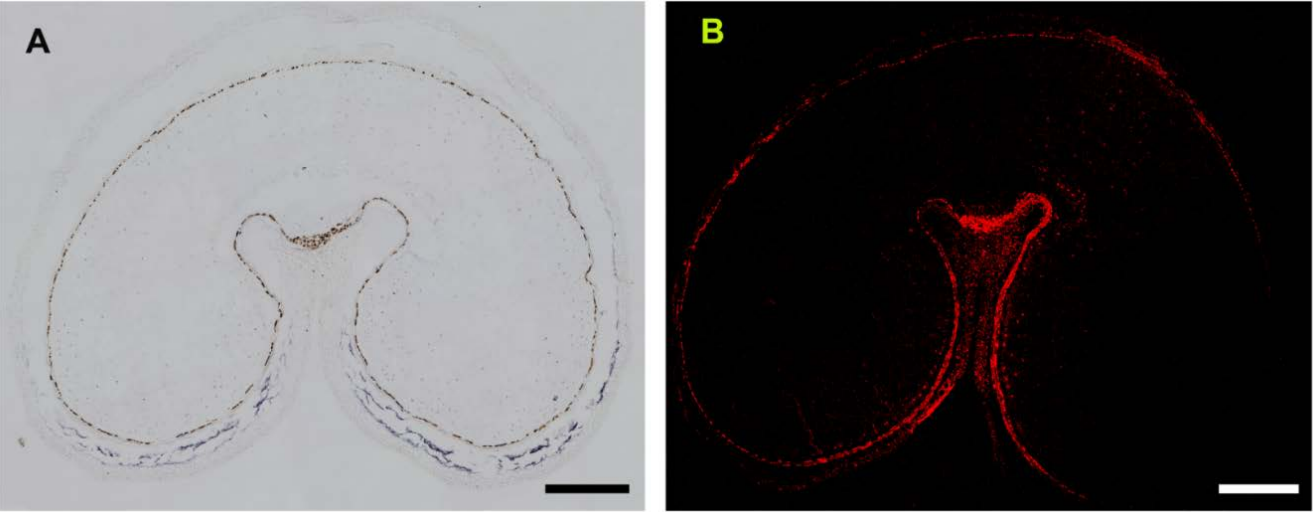

Supplement: supp_mct291_mct291supp.pdf [file supp_mct291_mct291supp.pdf]
